# Supplementary material
Source: HighWire-hosted journal article supplement (https://bmjopen.bmj.com/content/12/8/e060561)
Supplement: inline-supplementary-material-1 [file inline-supplementary-material-1.pdf]

**Supplementary table 1: Factors associated with injuries**

| Predictor              | Road traffic injuries |             | Unintentional injuries |             | Intentional injuries |             | Overall injury   |         |
|------------------------|-----------------------|-------------|------------------------|-------------|----------------------|-------------|------------------|---------|
|                        | COR<br>(95% CI)       | p-<br>value | COR<br>(95% CI)        | P-<br>value | COR<br>(95% CI)      | P-<br>value | COR<br>(95% CI)  | p-value |
| <b>Age</b>             |                       |             |                        |             |                      |             |                  |         |
| 15-29                  | 1                     |             |                        |             |                      |             |                  |         |
| 30-44                  | 0.59(0.26-1.30)       | 0.19        | 0.97(0.53-1.77)        | 0.93        | 0.70(0.42-1.18)      | 0.18        | 0.72(0.45-1.17)  | 0.19    |
| 45-69                  | 0.68(0.31-1.49)       | 0.33        | 0.94(0.47-1.85)        | 0.85        | 0.85 (0.47-1.52)     | 0.59        | 0.80(0.49-1.31)  | 0.38    |
| <b>Sex</b>             |                       |             |                        |             |                      |             |                  |         |
| Female                 | 1                     |             |                        |             |                      |             |                  |         |
| Male                   | 1.40(0.92-2.13)       | 0.11        | 0.82(0.48-1.39)        | 0.47        | 0.91 (0.59-1.39)     | 0.67        | 0.94(0.70- 1.27) | 0.72    |
| <b>Education level</b> |                       |             |                        |             |                      |             |                  |         |
| None/less than primary | 1                     |             |                        |             |                      |             |                  |         |
| Primary                | 0.99(0.37-2.64)       | 0.99        | 0.99(0.49-1.98)        | 0.98        | 0.61 (0.35-1.04)     | 0.07        | 0.83(0.51- 1.35) | 0.46    |
| Secondary              | 0.83(0.42-1.64)       | 0.60        | 1.22(0.61-2.45)        | 0.56        | 0.60 (0.27-1.34)     | 0.21        | 0.88(0.54-1.42)  | 0.60    |
| More than secondary    | 0.94(0.41-2.14)       | 0.88        | 1.64(0.88-3.06)        | 0.11        | 0.82 (0.38-1.80)     | 0.63        | 1.01(0.56- 1.80) | 0.96    |

|                           |                  |      |                  |      |                  |      |                  |      |
|---------------------------|------------------|------|------------------|------|------------------|------|------------------|------|
| <b>Place of residence</b> |                  |      |                  |      |                  |      |                  |      |
| Rural                     | 1                |      |                  |      |                  |      |                  |      |
| Urban                     | 0.59(0.24-1.45)  | 0.25 | 0.91(0.36-2.27)  | 0.84 | 1.07 (0.45-2.55) | 0.86 | 0.89 (0.46-1.72) | 0.74 |
| <b>Wealth quintile</b>    |                  |      |                  |      |                  |      |                  |      |
| Lowest                    | 1                |      |                  |      |                  |      |                  |      |
| Second                    | 1.76(0.67-4.58)  | 0.24 | 1.10(0.62-1.95)  | 0.72 | 1.05 (0.57-1.93) | 0.86 | 1.05(0.67- 1.65) | 0.80 |
| Middle                    | 2.95(1.27-6.84)  | 0.01 | 0.63 (0.28-1.39) | 0.25 | 0.78 (0.45-1.34) | 0.37 | 0.91(0.58-1.42)  | 0.69 |
| Fourth                    | 2.26(0.92-5.51)  | 0.07 | 0.53(0.23-1.21)  | 0.13 | 0.58 (0.27-1.23) | 0.15 | 0.79(0.47-1.33)  | 0.38 |
| Highest                   | 2.41(0.96 -6.02) | 0.06 | 0.56(0.29-1.08)  | 0.08 | 0.49 (0.21-1.17) | 0.11 | 0.78(0.47-1.26)  | 0.31 |
| <b>Occupation</b>         |                  |      |                  |      |                  |      |                  |      |
| Employed                  | 1                |      |                  |      |                  |      |                  |      |
| Student                   | 0.70(0.29-1.69)  | 0.43 | 0.47(.14-1.54)   | 0.21 | 2.35 (.74-7.49 ) | 0.14 | 0.84(0.43-1.63)  | 0.61 |
| Homemaker                 | 0.45(0.24-0.84)  | 0.01 | 0.75(0.46-1.23)  | 0.26 | 1.53 (0.77-3.06) | 0.21 | 0.74(0.47- 1.16) | 0.20 |
| Unemployed                | 0.65 (0.19-2.19) | 0.49 | 0.70 (0.21-2.30) | 0.56 | 2.13 (1.16-3.91) | 0.01 | 1.07(0.55-2.08)  | 0.82 |
| Others                    | 1                | -    | 0.07(0.00-.55)   | 0.01 | 0.30 (0.06-1.51) | 0.14 | 0.09(0.02- 0.35) | 0.00 |

|                       |                 |      |                  |      |                   |      |                  |      |
|-----------------------|-----------------|------|------------------|------|-------------------|------|------------------|------|
| <b>Marital status</b> |                 |      |                  |      |                   |      |                  |      |
| Never married         | 1               |      |                  |      |                   |      |                  |      |
| Currently married     | 0.71(0.34-1.46) | 0.35 | 0.50 (0.17-1.51) | 0.22 | 3.74 (1.37-10.17) | 0.01 | 1.02(0.56- 1.85) | 0.93 |
| Ever married          | 0.45(0.10-1.92) | 0.28 | 0.50(0.25-3.34)  | 0.89 | 3.49 (1.08-11.25) | 0.03 | 1.15 (0.54-2.46) | 0.70 |

COR: crude odds ratio; CI: Confidence interval; Crude odds ratio estimated from the binary logistic regression with all sociodemographic variables.

<sup>1</sup> Reference group
